# Supplementary material
Source: publisher figshare collection journal article supplement (https://karger.figshare.com/ndownloader/files/27948792)
Supplement: Supplementary file 1 [file 27948792]

**Supplementary Table S2.** Restriction enzymes used for satellite DNA isolation and the presence of satellite DNA bands.

| Restriction enzyme | Satellite band | Restriction enzyme | Satellite band |
| --- | --- | --- | --- |
| *Acc*Ⅰ | **-** | *Kpn*Ⅰ | **-** |
| *Afa*Ⅰ | **-** | *Mse*Ⅰ | **-** |
| *Alu*Ⅰ | **-** | *Msp*Ⅰ | **-** |
| *Apa*Ⅰ | **-** | *Not*Ⅰ | **-** |
| *Bam*HⅠ | **-** | *Pst*Ⅰ | **-** |
| *Bbs*Ⅰ | **-** | *Pvu*Ⅱ | **-** |
| *Bgl*Ⅰ | **-** | *Rsa*Ⅰ | **-** |
| *Bgl*Ⅱ | **-** | *Sca*Ⅰ | **-** |
| *Cfo*Ⅰ | **-** | *Sma*Ⅰ | **-** |
| *Dra*Ⅰ | **+** | *Sph*Ⅰ | **-** |
| *Eco*RⅠ | **-** | *Stu*Ⅰ | **-** |
| *Eco*T22Ⅰ | **-** | *Sty*Ⅰ | **-** |
| *Hae*Ⅲ | **-** | *Xba*Ⅰ | **-** |
| *Hind*Ⅲ | **-** | *Xho*Ⅰ | **-** |
| *Hinf*Ⅰ | **-** |  |  |
